# Supplementary material for: Multiple Stressors at the Land-Sea Interface: Cyanotoxins at the Land-Sea Interface in the Southern California Bight
Source: PubMed Central journal article supplement (PMC5371850; doi:10.3390/toxins9030095), 2017-03-09
Supplement: toxins-09-00095-s001.pdf [file toxins-09-00095-s001.pdf]

# Supplementary Materials: Multiple Stressors at the Land-Sea Interface: Cyanotoxins at the Land-Sea Interface in the Southern California Bight

Avery O. Tatters, Meredith D.A. Howard, Carey Nagoda, Lilian Busse, Alyssa G. Gellene and David A. Caron

**Table 1.** List of sampling locations along the Southern California Bight coastline.

| Site no. | Collection site            | Latitude  | Longitude   |
|----------|----------------------------|-----------|-------------|
| 1        | Arroyo Hondo               | 34.475887 | -120.142374 |
| 2        | Atascadero Creek           | 34.422523 | -119.823780 |
| 3        | San Jose Creek             | 34.424082 | -119.827486 |
| 4        | San Pedro Creek            | 34.421232 | -119.830163 |
| 5        | Tecolotito Creek           | 34.418000 | -119.833659 |
| 6        | Goleta Slough              | 34.422102 | -119.845172 |
| 7        | Devereaux Slough           | 34.409697 | -119.880109 |
| 8        | Ventura Harbor             | 34.241000 | -119.264000 |
| 9        | Santa Clara River Estuary  | 34.232180 | -119.260396 |
| 10       | Santa Clara River          | 34.237680 | -119.197751 |
| 11       | Channel Islands Harbor     | 34.169000 | -119.227000 |
| 12       | Calleguas Creek            | 34.112213 | -119.079411 |
| 13       | Zuma Lagoon                | 34.014135 | -118.820756 |
| 14       | Malibu Lagoon              | 34.033760 | -118.682106 |
| 15       | Topanga Creek              | 34.040031 | -118.583041 |
| 16       | Topanga Lagoon             | 34.038549 | -118.583066 |
| 17       | Rustic Creek               | 34.027905 | -118.519305 |
| 18       | Ballona Lagoon             | 33.962537 | -118.454495 |
| 19       | Marina Del Rey             | 33.971706 | -118.450240 |
| 20       | Ballona Creek              | 33.974475 | -118.433834 |
| 21       | Del Rey Lagoon             | 33.960382 | -118.450926 |
| 22       | King Harbor                | 33.848949 | -118.401446 |
| 23       | Malaga Creek               | 33.794100 | -118.381934 |
| 24       | Colorado Lagoon            | 33.770557 | -118.133009 |
| 25       | Alamitos Bay               | 33.747390 | -118.118825 |
| 26       | Mother's Beach             | 33.758569 | -118.119577 |
| 27       | San Gabriel River          | 33.742407 | -118.114911 |
| 28       | San Gabriel River upstream | 33.752656 | -118.104856 |
| 29       | Seal Beach                 | 33.728441 | -118.082656 |
| 30       | Huntington Harbour         | 33.728907 | -118.058610 |
| 31       | Bolsa Chica Channel/Basin  | 33.697001 | -118.047653 |
| 32       | San Diego Creek            | 33.651163 | -117.866067 |
| 33       | Upper Newport              | 33.649684 | -117.873630 |
| 34       | Back Bay                   | 33.619043 | -117.894136 |
| 35       | Aliso Creek                | 33.510813 | -117.752799 |
| 36       | Salt Creek                 | 33.481601 | -117.724729 |
| 37       | Dana Point Harbor          | 33.462161 | -117.705311 |
| 38       | San Juan Creek             | 33.462203 | -117.684102 |
| 39       | San Mateo Creek            | 33.387295 | -117.592901 |
| 40       | Santa Margarita River      | 33.237637 | -117.396464 |
| 41       | Oceanside Harbor           | 33.207396 | -117.395188 |
| 42       | Loma Alta Creek            | 33.177303 | -117.368736 |
| 43       | San Luis Rey River         | 33.203937 | -117.389797 |
| 44       | Buena Vista Creek/Lagoon   | 33.168145 | -118.826982 |
| 45       | Agua Hendionda             | 33.144478 | -117.336636 |
| 46       | Batiquitos Lagoon          | 33.088702 | -117.309584 |
| 47       | San Elijo Lagoon           | 33.013767 | -117.275189 |
| 48       | Los Penasquitos            | 32.932840 | -117.257526 |
| 49       | San Dieguito River         | 32.972259 | -117.266138 |
| 50       | Mission Bay                | 32.782587 | -117.210519 |
| 51       | San Diego Bay              | 32.639170 | -117.117971 |
| 52       | Sweetwater River           | 32.652057 | -117.099748 |
| 53       | Tijuana River/Estuary      | 32.552610 | -117.124614 |
